# Supplementary material for: Intrahepatic cholangiocarcinoma can arise from Notch-mediated conversion of hepatocytes
Source: JCI journal article supplement (doi:10.1172/jci63065), 2012-10-01
Supplement: sd1 [file 1]

**A**

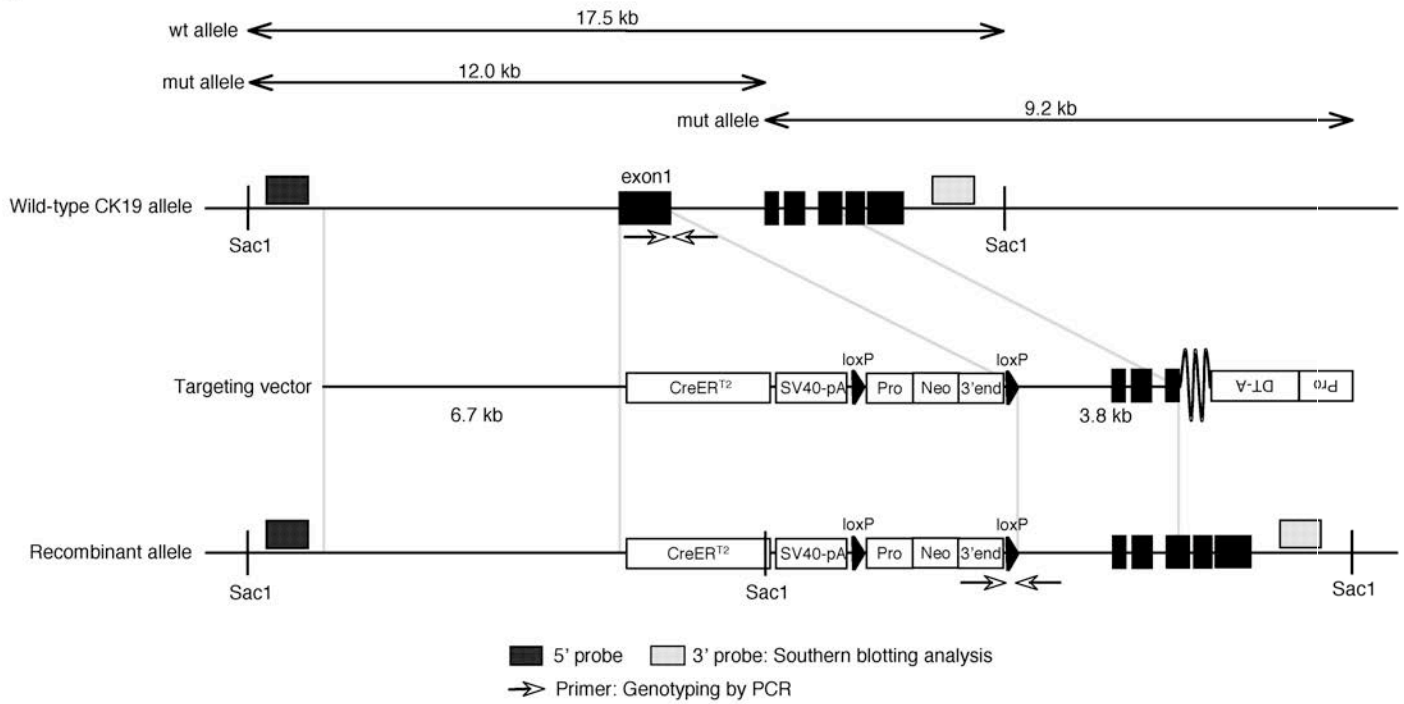

**B**

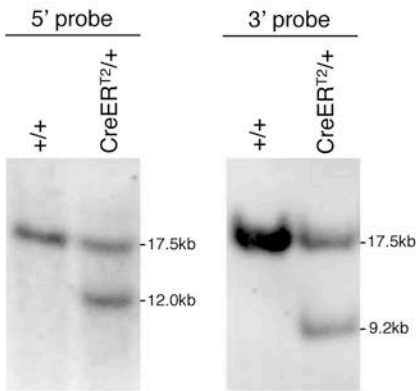

**C**

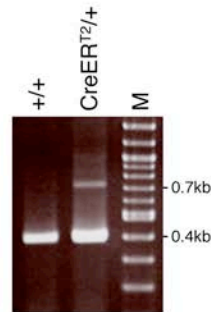

**Supplemental Figure 1** Targeting strategy for producing the *CK19-CreER<sup>T2</sup>* knock-in allele. (A) Targeted insertion of the CreER<sup>T2</sup> coding sequence into the first exon of the *CK19* gene by homologous recombination in embryonic stem cells. (B) Genomic Southern blotting analyses of parental and targeted embryonic stem cells using 5' and 3' probes. (C) PCR genotyping using genomic DNA from tail snips obtained from wild-type and *CK19-CreER<sup>T2</sup>* heterozygous mice. M, markers.

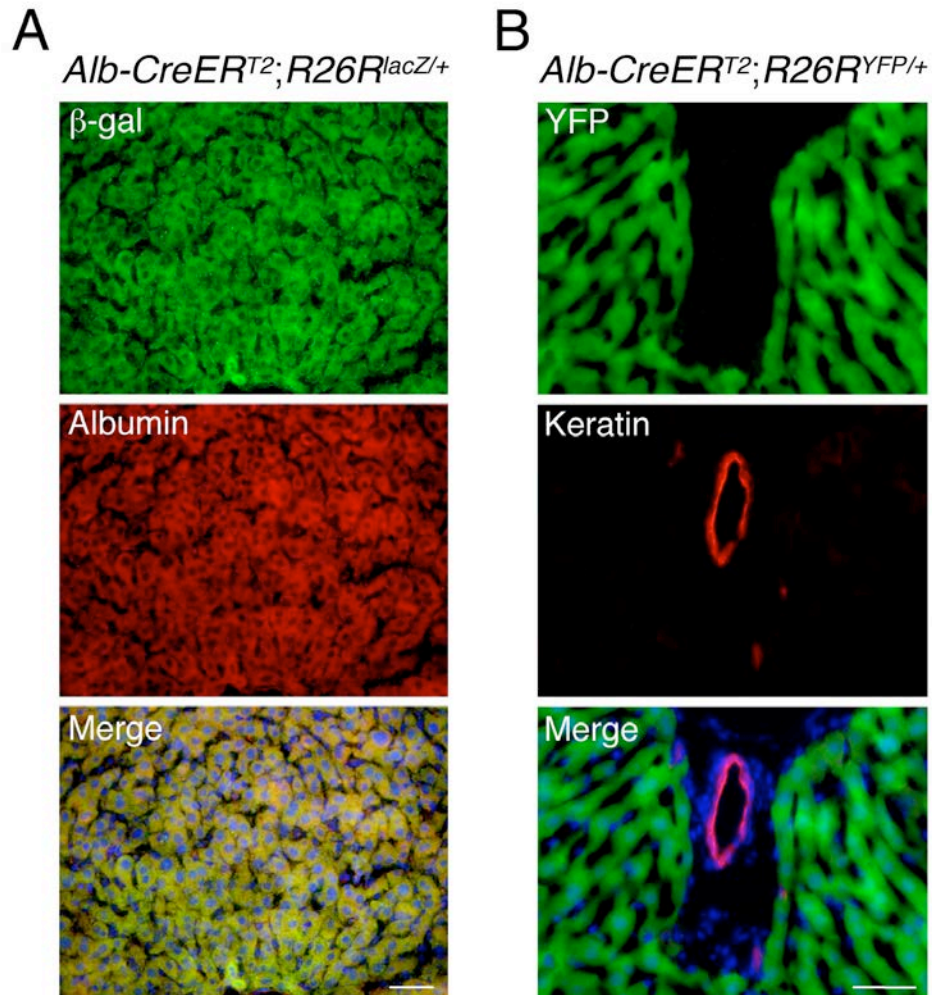

**Supplemental Figure 2** Genetic marking of *albumin*-expressing hepatocytes in the adult mouse liver. (A) Co-immunofluorescence staining of  $\beta$ -gal and albumin was conducted in the liver of  $Alb-CreER^{T2};R26R^{lacZ/+}$  mice at 1 week after TM injection. Yellow signals indicate merged red and green signals (bottom panel). (B) Immunofluorescence staining of the cholangiocyte marker keratin was conducted in the liver of  $Alb-CreER^{T2};R26R^{YFP/+}$  mice at 1 week after TM injection. YFP expression is induced in hepatocytes, but not in keratin-positive cholangiocytes. DNA was stained with DAPI. Scale bars, 50  $\mu$ m.

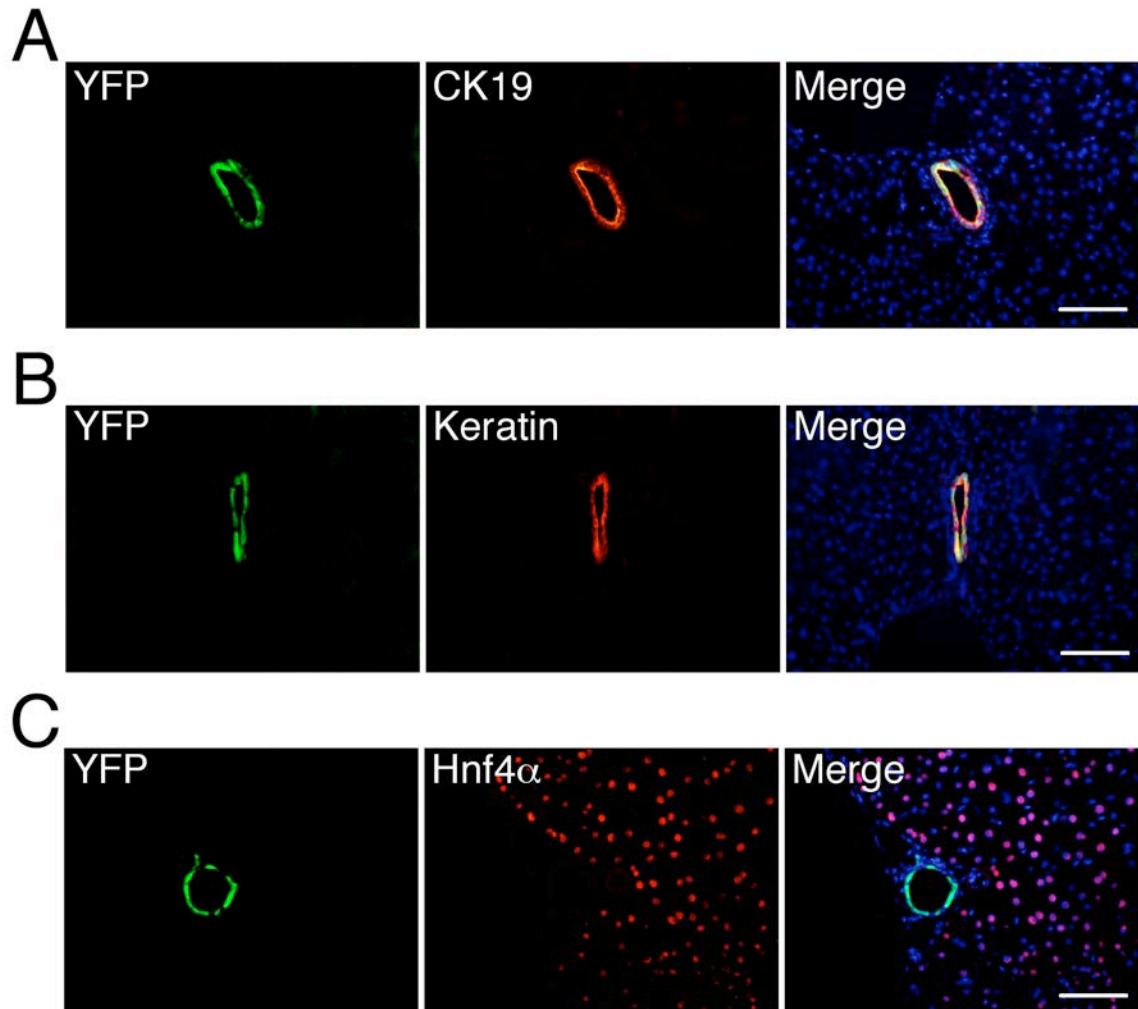

**Supplemental Figure 3** Genetic marking of *CK19*-expressing cholangiocytes in the adult mouse liver. (A–C) Immunofluorescence staining of CK19 (A), keratin (B) and Hnf4α (C) were conducted in the liver of *CK19-CreER<sup>T2</sup>;R26R<sup>YFP/+</sup>* mice at 1 week after TM injection. YFP expression is induced in cholangiocytes, but not in Hnf4α-positive hepatocytes. DNA was stained with DAPI. Scale bars, 100 μm.

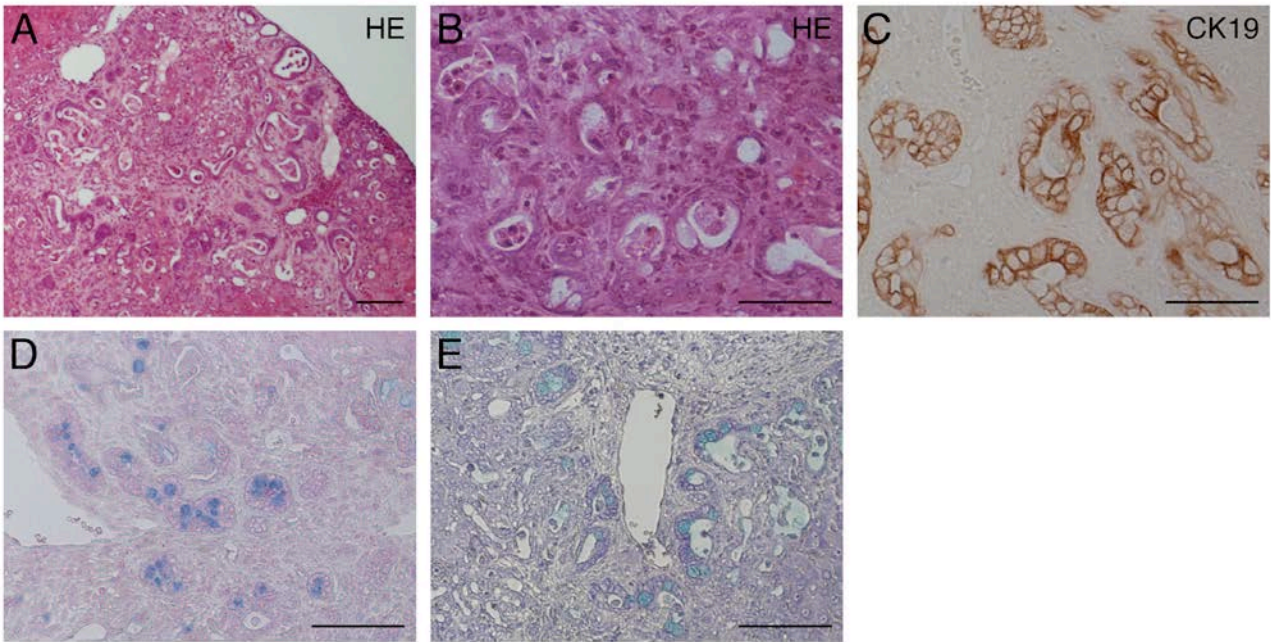

**Supplemental Figure 4** Histological, immunohistochemical and histochemical analyses of neoplastic nodules formed in the liver after 30 weeks of TAA administration. (A–E) Hematoxylin and eosin (HE) staining (A and B), immunohistochemical staining of CK19 (C) and alcian blue staining with nuclear fast red (D) or hematoxylin (E) counterstaining were conducted for neoplastic nodules formed in the liver. Scale bars, 100  $\mu\text{m}$  (A, D and E) and 50  $\mu\text{m}$  (B and C).

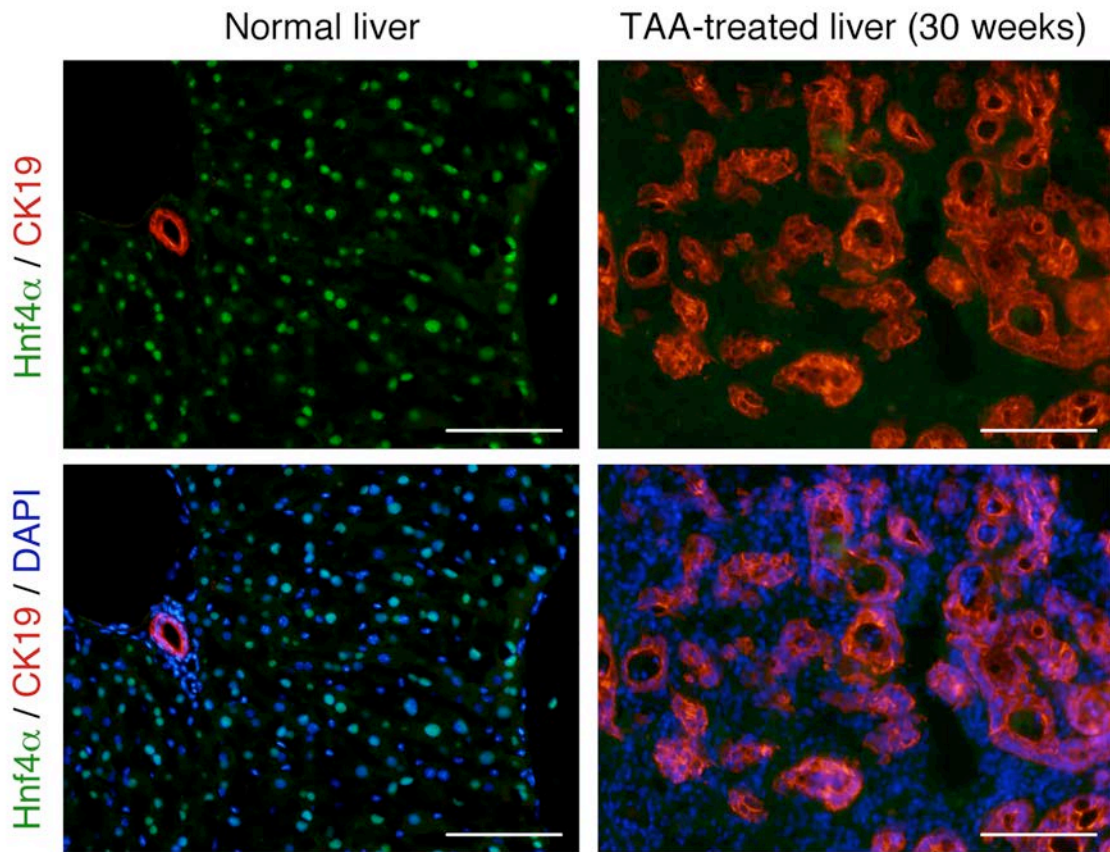

**Supplemental Figure 5** The absence of Hnf4 $\alpha$  expression in primitive ductular cells eliminates the possibility of the development of hepatocellular carcinoma with pseudoglandular formation after 30 weeks of TAA administration. Co-immunofluorescence staining of Hnf4 $\alpha$  and CK19 was conducted for normal (left panels) or TAA-treated (right panels) livers. DNA was stained with DAPI. Scale bars, 100  $\mu$ m.

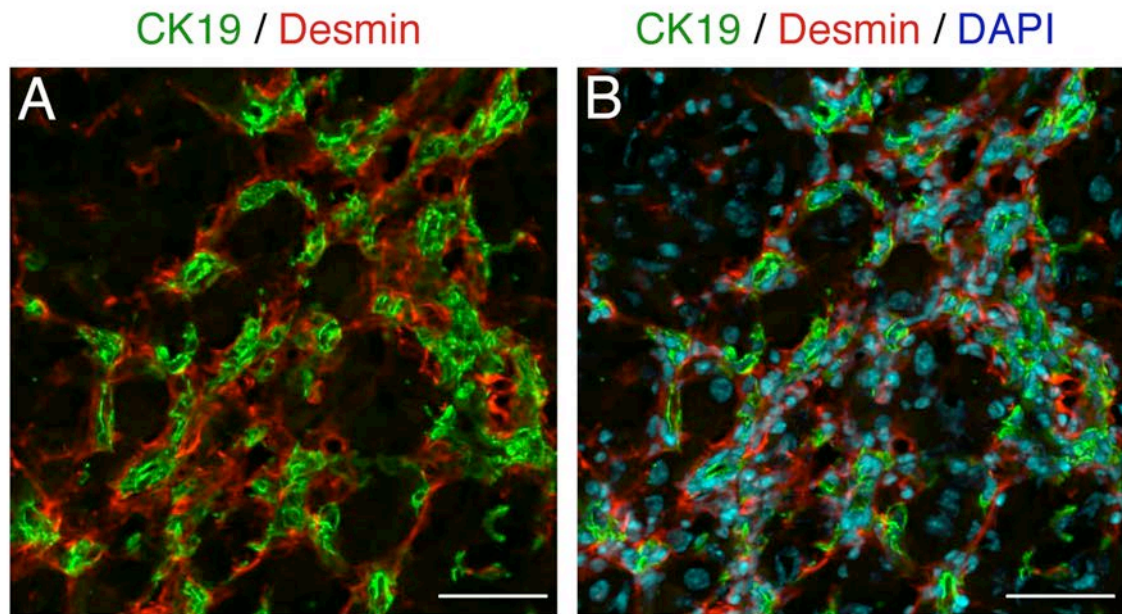

**Supplemental Figure 6** Confocal microscopic analyses show that TAA-induced biliary lineage cells around the central veins in the liver are distinct from surrounding stellate cells. (**A** and **B**) Co-immunofluorescence staining of CK19 and desmin in the liver was conducted after 14 weeks of TAA administration. DNA was stained with DAPI. Scale bars, 50  $\mu\text{m}$ .

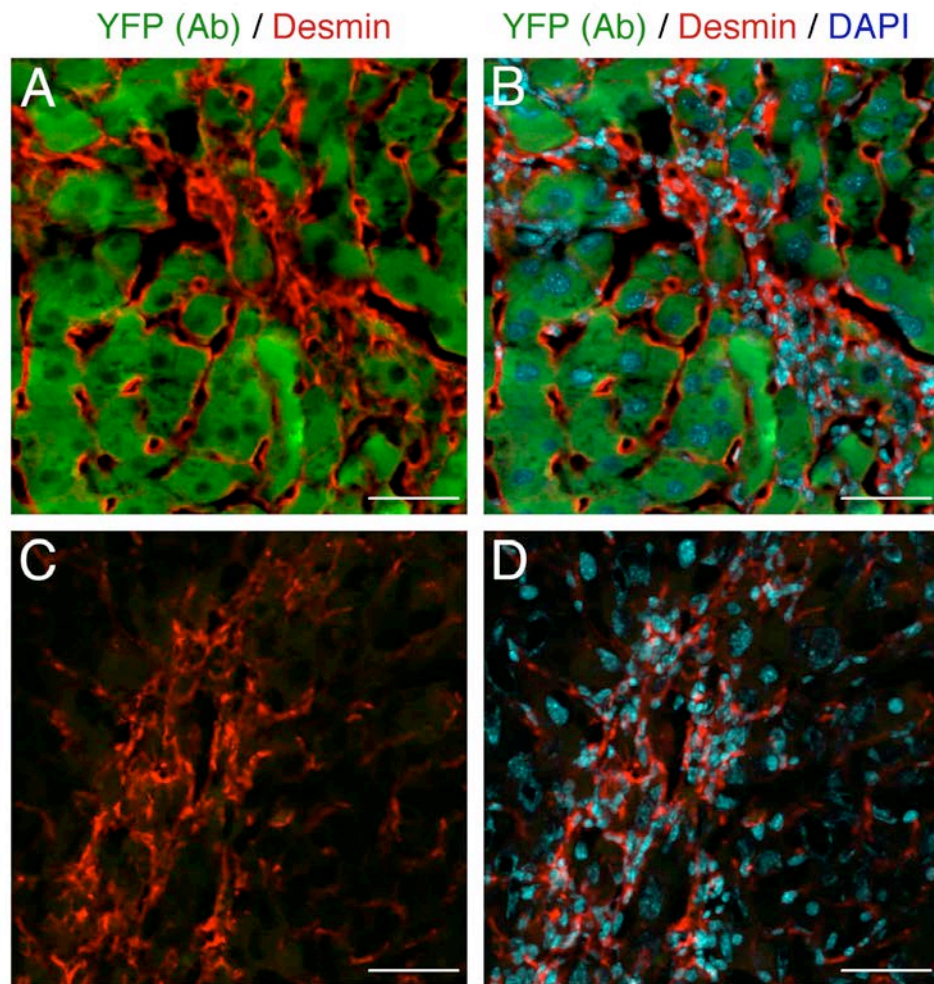

**Supplemental Figure 7** Confocal microscopic analyses show that TAA does not induce unexpected Cre activity in stellate cells, regardless of the presence or absence of TM administration. (A–D) Co-immunofluorescence staining of YFP and desmin was conducted in the liver of *Alb-CreER<sup>T2</sup>;R26R<sup>YFP/+</sup>* mice after 14 weeks of TAA administration, with (A and B) or without (C and D) prior administration of TM. Ab: an anti-GFP/YFP antibody was used. DNA was stained with DAPI. Scale bars, 50  $\mu\text{m}$ .

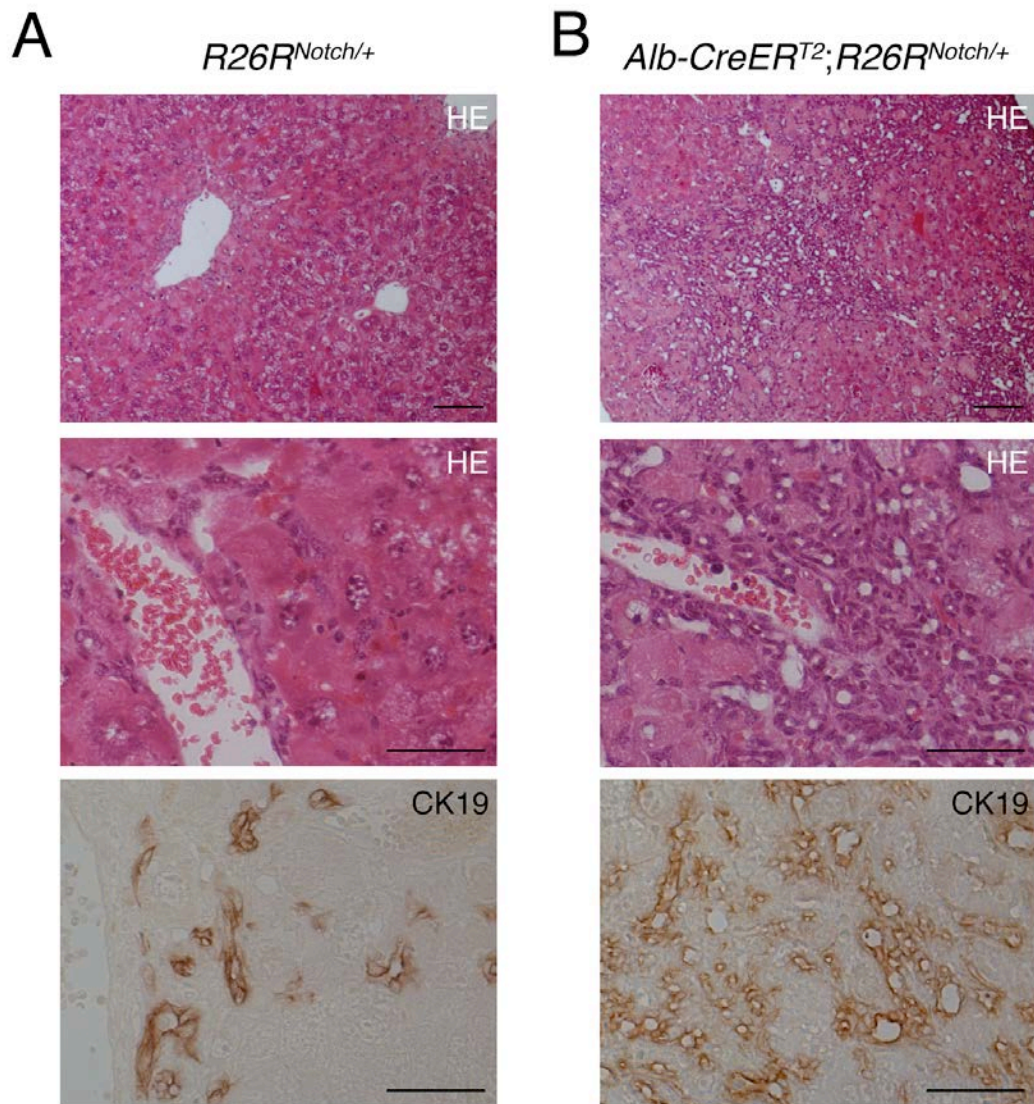

**Supplemental Figure 8** The number of developing primitive ductules formed by TAA-induced biliary lineage cells is significantly increased when Notch signaling is activated in hepatocytes. (A and B) Hematoxylin and eosin (HE) staining and immunohistochemical staining of CK19 were conducted in the liver of *R26R<sup>Notch/+</sup>* (A) and *Alb-CreERT<sup>2</sup>;R26R<sup>Notch/+</sup>* (B) mice after 14 weeks of TAA administration. Scale bars, 100  $\mu$ m (A and B, upper panels) and 50  $\mu$ m (A and B, middle and bottom panels).



Supplemental Table 1. Notch activation is significant for neoplastic nodule formation after 14 weeks of TAA administration.

| Mouse line                                           | Nodule formation |
|------------------------------------------------------|------------------|
| <i>R26R<sup>Notch/+</sup></i>                        | 0/5 (0%)         |
| <i>Alb-CreER<sup>T2</sup>;R26R<sup>Notch/+</sup></i> | 7/7 (100%)       |
| <i>Alb-CreER<sup>T2</sup>;Hes1<sup>fl/fl</sup></i>   | 0/6 (0%)         |

**Supplemental Table 1** Macroscopic nodule formation in the liver of the indicated mouse lines after 14 weeks of TAA administration.
